# Supplementary material
Source: publisher figshare collection journal article supplement (https://rs.figshare.com/ndownloader/files/43621291)
Supplement: Supplementary file 1 [file 43621291]

## Sheet: table_S1_extracts
SUPPLEMENTARY TABLES FROM: Prebus MM, Georgiev BB, van de Kamp T, Hamann E, Baker I, Rabeling C. 2023. The rediscovery of the putative ant social parasite Manica parasitica syn. nov. (Hymenoptera: Formicidae) reveals an unexpected endoparasite syndrome.
genus	species	extract	sample name	SpecimenCode	CollectionCode	LifeStageSex	Medium	LocatedAt	OwnedBy	TypeStatus	DeterminedBy	DateDetermined	CollectedBy	DateCollectedStart	DateCollectedEnd	Method	Habitat	Microhabitat	CollectionNotes	LocalityName	Adm2	Adm1	Country	Elevation	LocLatitude	LocLongitude	LatLonMaxError	BiogeographicRegion	LocalityNotes	ElevationMaxError
Manica	bradleyi_CA_Camp_W_CR210623_01	P1197	Manica_bradleyi_CA_Camp_W_CR210623_01_P1197	CASENT4010599	CR210623-01	1w	pin	ASUHIC	ASUHIC		M.M. Prebus		C.Rabeling	2021-06-23	2021-06-23	hand collecting	dry meadow in pine-fir forest	nests in soil	dry meadow in pine-fir forest with Pinus jeffreyi, Pseudotsuga menziesii, Abies concolor, and Calocedrus decurrens. Soil was silty.	Camp Wolfeboro BSA	Tuolumne	California	United States	1760m	38.4096	-120.079	10m	Nearctic
Manica	bradleyi_CA_Camp_W_CR210623_04	P1199	Manica_bradleyi_CA_Camp_W_CR210623_04_P1199	CASENT4010601	CR210623-04	1w	pin	ASUHIC	ASUHIC		M.M. Prebus		C.Rabeling	2021-06-23	2021-06-23	hand collecting	dry meadow in pine-fir forest	nests in soil	dry meadow in pine-fir forest with Pinus jeffreyi, Pseudotsuga menziesii, Abies concolor, and Calocedrus decurrens. Soil was silty.	Camp Wolfeboro BSA	Tuolumne	California	United States	1760m	38.4096	-120.079	10m	Nearctic
Manica	bradleyi_CA_Camp_W_CR210623_05	P1201	Manica_bradleyi_CA_Camp_W_CR210623_05_P1201	CASENT4010603	CR210623-05	1w	pin	ASUHIC	ASUHIC		M.M. Prebus		C.Rabeling	2021-06-23	2021-06-23	hand collecting	dry meadow in pine-fir forest	nests in soil	dry meadow in pine-fir forest with Pinus jeffreyi, Pseudotsuga menziesii, Abies concolor, and Calocedrus decurrens. Soil was silty.	Camp Wolfeboro BSA	Tuolumne	California	United States	1760m	38.4096	-120.079	10m	Nearctic
Manica	bradleyi_CA_Camp_W_MMP03582_1	P1203	Manica_bradleyi_CA_Camp_W_MMP03582_1_P1203	CASENT4010605	MMP03582	1w	pin	ASUHIC	ASUHIC		M.M. Prebus		M.M. Prebus	2021-06-23	2021-06-23	hand collecting	dry meadow in pine-fir forest	nests in soil	dry meadow in pine-fir forest with Pinus jeffreyi, Pseudotsuga menziesii, Abies concolor, and Calocedrus decurrens. Soil was silty.	Camp Wolfeboro BSA	Tuolumne	California	United States	1760m	38.4096	-120.079	10m	Nearctic
Manica	bradleyi_CA_Camp_W_MMP03582_2	P1205	Manica_bradleyi_CA_Camp_W_MMP03582_2_P1205	CASENT4010607	MMP03582	1w	pin	ASUHIC	ASUHIC		M.M. Prebus		M.M. Prebus	2021-06-23	2021-06-23	hand collecting	dry meadow in pine-fir forest	nests in soil	dry meadow in pine-fir forest with Pinus jeffreyi, Pseudotsuga menziesii, Abies concolor, and Calocedrus decurrens. Soil was silty.	Camp Wolfeboro BSA	Tuolumne	California	United States	1760m	38.4096	-120.079	10m	Nearctic
Manica	bradleyi_CA_Camp_W_MMP03583_1	P1207	Manica_bradleyi_CA_Camp_W_MMP03583_1_P1207	CASENT4010609	MMP03583	1w	pin	ASUHIC	ASUHIC		M.M. Prebus		M.M. Prebus	2021-06-23	2021-06-23	hand collecting	dry meadow in pine-fir forest	nests in soil	dry meadow in pine-fir forest with Pinus jeffreyi, Pseudotsuga menziesii, Abies concolor, and Calocedrus decurrens. Soil was silty.	Camp Wolfeboro BSA	Tuolumne	California	United States	1760m	38.4096	-120.079	10m	Nearctic
Manica	bradleyi_CA_Carson_Pass	P589	Manica_bradleyi_CA_Carson_Pass_P589	CASENT0868478	PSW14655	1w	pin	UCDC	UCDC		P.S. Ward		P.S. Ward	2002-07-12			pine-hemlock forest	ground foragers		2km S Carson Pass	Alpine	California	United States	2680m	38.6833	-119.983		Nearctic
Manica	bradleyi_CA_Clark_Fork	P605	Manica_bradleyi_CA_Clark_Fork_P605	CASENT0868788	MMP03326.2	1w	pin	ASUHIC	ASUHIC		M.M. Prebus		M.M. Prebus	2019-07-23	2019-07-23	hand collecting	meadow edge	nest in packed gravel, foragers outside of nest entrance		Clark Fork trailhead	Alpine	California	United States	2000m	38.4187	-119.749	5m	Nearctic
Manica	bradleyi_CA_Clark_Fork_CR210622_01	P1185	Manica_bradleyi_CA_Clark_Fork_CR210622_01_P1185	CASENT4010587	CR210622-01	1w	pin	ASUHIC	ASUHIC		M.M. Prebus		C.Rabeling	2021-06-22	2021-06-22	hand collecting	wet meadow in pine-fir forest	nest in gravelly soil	edge of wet meadow in pine-fir forest with Pinus jeffreyi, Pseudotsuga menziesii, Abies concolor, and Calocedrus decurrens. Soil was a mixure of granite gravel and silt.	Clark Fork trailhead	Tuolumne	California	United States	1975m	38.4186	-119.749	10m	Nearctic
Manica	bradleyi_CA_Clark_Fork_CR210624_01	P1193	Manica_bradleyi_CA_Clark_Fork_CR210624_01_P1193	CASENT4010595	CR210624-01	1w	pin	ASUHIC	ASUHIC		M.M. Prebus		C.Rabeling	2021-06-24	2021-06-24	hand collecting	wet meadow in pine-fir forest	nest in gravelly soil	edge of wet meadow in pine-fir forest with Pinus jeffreyi, Pseudotsuga menziesii, Abies concolor, and Calocedrus decurrens. Soil was a mixure of granite gravel and silt.	Clark Fork trailhead	Tuolumne	California	United States	1975m	38.4186	-119.749	10m	Nearctic
Manica	bradleyi_CA_Clark_Fork_CR210625_01	P1195	Manica_bradleyi_CA_Clark_Fork_CR210625_01_P1195	CASENT4010597	CR210625-01	1w	pin	ASUHIC	ASUHIC		M.M. Prebus		C.Rabeling	2021-06-25	2021-06-25	hand collecting	wet meadow in pine-fir forest	nest in gravelly soil	edge of wet meadow in pine-fir forest with Pinus jeffreyi, Pseudotsuga menziesii, Abies concolor, and Calocedrus decurrens. Soil was a mixure of granite gravel and silt.	Clark Fork trailhead	Tuolumne	California	United States	1975m	38.4186	-119.749	10m	Nearctic
Manica	bradleyi_CA_Clark_Fork_MMP03579	P1191	Manica_bradleyi_CA_Clark_Fork_MMP03579_P1191	CASENT4010593	MMP03579	1w	pin	ASUHIC	ASUHIC		M.M. Prebus		M.M. Prebus	2021-06-22	2021-06-22	hand collecting	wet meadow in pine-fir forest	nest in gravelly soil	edge of wet meadow in pine-fir forest with Pinus jeffreyi, Pseudotsuga menziesii, Abies concolor, and Calocedrus decurrens. Soil was a mixure of granite gravel and silt.	Clark Fork trailhead	Tuolumne	California	United States	1975m	38.4186	-119.749	10m	Nearctic
Manica	bradleyi_CA_Clark_Fork_MMP03585	P1189	Manica_bradleyi_CA_Clark_Fork_MMP03585_P1189	CASENT4010591	MMP03585	1w	pin	ASUHIC	ASUHIC		M.M. Prebus		M.M. Prebus	2021-06-24	2021-06-24	hand collecting	wet meadow in pine-fir forest	nest in gravelly soil	edge of wet meadow in pine-fir forest with Pinus jeffreyi, Pseudotsuga menziesii, Abies concolor, and Calocedrus decurrens. Soil was a mixure of granite gravel and silt.	Clark Fork trailhead	Tuolumne	California	United States	1975m	38.4186	-119.749	10m	Nearctic
Manica	bradleyi_CA_Clark_Fork_MMP03587	P1187	Manica_bradleyi_CA_Clark_Fork_MMP03587_P1187	CASENT4010589	MMP03587	1w	pin	ASUHIC	ASUHIC		M.M. Prebus		M.M. Prebus	2021-06-25	2021-06-25	hand collecting	wet meadow in pine-fir forest	nest in gravelly soil	edge of wet meadow in pine-fir forest with Pinus jeffreyi, Pseudotsuga menziesii, Abies concolor, and Calocedrus decurrens. Soil was a mixure of granite gravel and silt.	Clark Fork trailhead	Tuolumne	California	United States	1975m	38.4186	-119.749	10m	Nearctic
Manica	bradleyi_CA_Hope_Valley	P860	Manica_bradleyi_CA_Hope_Valley_P860	CASENT4014610	MMP01290	1w	pin	ASUHIC	ASUHIC		M.M. Prebus	2013-10-02	M.M. Prebus	2013-10-05	2013-10-05	hand collecting	pine/juniper woodland	nest in sand	at W end of Dardanelles lake, collected around 3:00 PM. Crater nest in sandy soil. Many workers at nest entrance 2-4 cm below surface. Nest appeared to run horizontally 4 cm below surface, parallel to the surface of the sand. No brood or foundresses were found.	7.5km W Hope Valley	El Dorado	California	United States	2370m	38.761	-120.023	10m	Nearctic		5
Manica	bradleyi_CA_Lake_Tahoe	P581	Manica_bradleyi_CA_Lake_Tahoe_P581	CASENT0867773	PSW12888	1w	pin	UCDC	UCDC		P.S. Ward		P.S. Ward	1995-06-18			pine-fir forest	crater nest		8km NW S Lake Tahoe	El Dorado	California	United States	1950m	38.95	-120.083		Nearctic
Manica	bradleyi_CA_Lang_Crossing	P588	Manica_bradleyi_CA_Lang_Crossing_P588	CASENT0868477	PSW14612	1w	pin	UCDC	UCDC		P.S. Ward		P.S. Ward	2002-06-18			Sierran meadow	under log		Lang Crossing, S fork Yuba R.	Nevada	California	United States	1425m	39.3167	-120.65		Nearctic
Manica	bradleyi_CA_Sequoia	P1208	Manica_bradleyi_CA_Sequoia_P1208	CASENT4010610	CR210619-02	1w	pin	ASUHIC	ASUHIC		M.M. Prebus		C.Rabeling	2021-06-19								California	United States					Nearctic
Manica	bradleyi_CA_Wrightwood	P587	Manica_bradleyi_CA_Wrightwood_P587	CASENT0868476	JdesL11072	1w	pin	UCDC	UCDC		P.S. Ward		J. des Lauriers	2012-06-19		pifall	Ceanothus, old burn	pitfall		East Blue Ridge Rd, 1.9 mi SW Wrightwood	Los Angeles	California	United States	2515m	34.3408	-117.657		Nearctic
Manica	bradleyi_NV_Mt_Rose	P586	Manica_bradleyi_NV_Mt_Rose_P586	CASENT0868786	PSW16424	1w	pin	UCDC	UCDC		P.S. Ward		P.S. Ward	2010-07-11			open Pinus albicaulis forest	ground nest, around and under stone, with craters at surface	PSW16424: coll: 16w, larvae, eggs. 1w: CASENT0106965 (top w of 3w on pin) (potential DNA voucher)	3 km SSE Mt. Rose	Washoe	Nevada	United States	2650 m	39.32	-119.902	4m	Nearctic
Manica	invidia_CA_Lang_Crossing	P596	Manica_invidia_CA_Lang_Crossing_P596	CASENT0868484	PSW14615	1w	pin	UCDC	UCDC		P.S. Ward		P.S. Ward	2002-06-18			Sierran meadow	ground nest		Lang Crossing, S fork Yuba R.	Nevada	California	United States	1425m	39.3167	-120.65		Nearctic
Manica	parasitica_CA_Camp_W_CR210623_01	P1196	Manica_parasitica_CA_Camp_W_CR210623_01_P1196	CASENT4010598	CR210623-01	1w	pin	ASUHIC	ASUHIC		M.M. Prebus		C.Rabeling	2021-06-23	2021-06-23	hand collecting	dry meadow in pine-fir forest	nests in soil	dry meadow in pine-fir forest with Pinus jeffreyi, Pseudotsuga menziesii, Abies concolor, and Calocedrus decurrens. Soil was silty.	Camp Wolfeboro BSA	Tuolumne	California	United States	1760m	38.4096	-120.079	10m	Nearctic
Manica	parasitica_CA_Camp_W_CR210623_04	P1198	Manica_parasitica_CA_Camp_W_CR210623_04_P1198	CASENT4010600	CR210623-04	1w	pin	ASUHIC	ASUHIC		M.M. Prebus		C.Rabeling	2021-06-23	2021-06-23	hand collecting	dry meadow in pine-fir forest	nests in soil	dry meadow in pine-fir forest with Pinus jeffreyi, Pseudotsuga menziesii, Abies concolor, and Calocedrus decurrens. Soil was silty.	Camp Wolfeboro BSA	Tuolumne	California	United States	1760m	38.4096	-120.079	10m	Nearctic
Manica	parasitica_CA_Camp_W_CR210623_05	P1200	Manica_parasitica_CA_Camp_W_CR210623_05_P1200	CASENT4010602	CR210623-05	1w	pin	ASUHIC	ASUHIC		M.M. Prebus		C.Rabeling	2021-06-23	2021-06-23	hand collecting	dry meadow in pine-fir forest	nests in soil	dry meadow in pine-fir forest with Pinus jeffreyi, Pseudotsuga menziesii, Abies concolor, and Calocedrus decurrens. Soil was silty.	Camp Wolfeboro BSA	Tuolumne	California	United States	1760m	38.4096	-120.079	10m	Nearctic
Manica	parasitica_CA_Camp_W_MMP03582_1	P1202	Manica_parasitica_CA_Camp_W_MMP03582_1_P1202	CASENT4010604	MMP03582	1w	pin	ASUHIC	ASUHIC		M.M. Prebus		M.M. Prebus	2021-06-23	2021-06-23	hand collecting	dry meadow in pine-fir forest	nests in soil	dry meadow in pine-fir forest with Pinus jeffreyi, Pseudotsuga menziesii, Abies concolor, and Calocedrus decurrens. Soil was silty.	Camp Wolfeboro BSA	Tuolumne	California	United States	1760m	38.4096	-120.079	10m	Nearctic
Manica	parasitica_CA_Camp_W_MMP03582_2	P1204	Manica_parasitica_CA_Camp_W_MMP03582_2_P1204	CASENT4010606	MMP03582	1w	pin	ASUHIC	ASUHIC		M.M. Prebus		M.M. Prebus	2021-06-23	2021-06-23	hand collecting	dry meadow in pine-fir forest	nests in soil	dry meadow in pine-fir forest with Pinus jeffreyi, Pseudotsuga menziesii, Abies concolor, and Calocedrus decurrens. Soil was silty.	Camp Wolfeboro BSA	Tuolumne	California	United States	1760m	38.4096	-120.079	10m	Nearctic
Manica	parasitica_CA_Camp_W_MMP03583_1	P1206	Manica_parasitica_CA_Camp_W_MMP03583_1_P1206	CASENT4010608	MMP03583	1w	pin	ASUHIC	ASUHIC		M.M. Prebus		M.M. Prebus	2021-06-23	2021-06-23	hand collecting	dry meadow in pine-fir forest	nests in soil	dry meadow in pine-fir forest with Pinus jeffreyi, Pseudotsuga menziesii, Abies concolor, and Calocedrus decurrens. Soil was silty.	Camp Wolfeboro BSA	Tuolumne	California	United States	1760m	38.4096	-120.079	10m	Nearctic
Manica	parasitica_CA_Clark_Fork	P604	Manica_parasitica_CA_Clark_Fork_P604	CASENT0868787	MMP03326.1	1w	pin	ASUHIC	ASUHIC		M.M. Prebus		M.M. Prebus	2019-07-23	2019-07-23	hand collecting	meadow edge	nest in packed gravel, foragers outside of nest entrance		Clark Fork trailhead	Alpine	California	United States	2000m	38.4187	-119.749	5m	Nearctic
Manica	parasitica_CA_Clark_Fork_CR210622_01	P1184	Manica_parasitica_CA_Clark_Fork_CR210622_01_P1184	CASENT4010586	CR210622-01	1w	pin	ASUHIC	ASUHIC		M.M. Prebus		C.Rabeling	2021-06-22	2021-06-22	hand collecting	wet meadow in pine-fir forest	nest in gravelly soil	edge of wet meadow in pine-fir forest with Pinus jeffreyi, Pseudotsuga menziesii, Abies concolor, and Calocedrus decurrens. Soil was a mixure of granite gravel and silt.	Clark Fork trailhead	Tuolumne	California	United States	1975m	38.4186	-119.749	10m	Nearctic
Manica	parasitica_CA_Clark_Fork_CR210624_01	P1192	Manica_parasitica_CA_Clark_Fork_CR210624_01_P1192	CASENT4010594	CR210624-01	1w	pin	ASUHIC	ASUHIC		M.M. Prebus		C.Rabeling	2021-06-24	2021-06-24	hand collecting	wet meadow in pine-fir forest	nest in gravelly soil	edge of wet meadow in pine-fir forest with Pinus jeffreyi, Pseudotsuga menziesii, Abies concolor, and Calocedrus decurrens. Soil was a mixure of granite gravel and silt.	Clark Fork trailhead	Tuolumne	California	United States	1975m	38.4186	-119.749	10m	Nearctic
Manica	parasitica_CA_Clark_Fork_CR210625_01	P1194	Manica_parasitica_CA_Clark_Fork_CR210625_01_P1194	CASENT4010596	CR210625-01	1w	pin	ASUHIC	ASUHIC		M.M. Prebus		C.Rabeling	2021-06-25	2021-06-25	hand collecting	wet meadow in pine-fir forest	nest in gravelly soil	edge of wet meadow in pine-fir forest with Pinus jeffreyi, Pseudotsuga menziesii, Abies concolor, and Calocedrus decurrens. Soil was a mixure of granite gravel and silt.	Clark Fork trailhead	Tuolumne	California	United States	1975m	38.4186	-119.749	10m	Nearctic
Manica	parasitica_CA_Clark_Fork_MMP03579	P1190	Manica_parasitica_CA_Clark_Fork_MMP03579_P1190	CASENT4010592	MMP03579	1w	pin	ASUHIC	ASUHIC		M.M. Prebus		M.M. Prebus	2021-06-22	2021-06-22	hand collecting	wet meadow in pine-fir forest	nest in gravelly soil	edge of wet meadow in pine-fir forest with Pinus jeffreyi, Pseudotsuga menziesii, Abies concolor, and Calocedrus decurrens. Soil was a mixure of granite gravel and silt.	Clark Fork trailhead	Tuolumne	California	United States	1975m	38.4186	-119.749	10m	Nearctic
Manica	parasitica_CA_Clark_Fork_MMP03585	P1188	Manica_parasitica_CA_Clark_Fork_MMP03585_P1188	CASENT4010590	MMP03585	1w	pin	ASUHIC	ASUHIC		M.M. Prebus		M.M. Prebus	2021-06-24	2021-06-24	hand collecting	wet meadow in pine-fir forest	nest in gravelly soil	edge of wet meadow in pine-fir forest with Pinus jeffreyi, Pseudotsuga menziesii, Abies concolor, and Calocedrus decurrens. Soil was a mixure of granite gravel and silt.	Clark Fork trailhead	Tuolumne	California	United States	1975m	38.4186	-119.749	10m	Nearctic
Manica	parasitica_CA_Clark_Fork_MMP03587	P1186	Manica_parasitica_CA_Clark_Fork_MMP03587_P1186	CASENT4010588	MMP03587	1w	pin	ASUHIC	ASUHIC		M.M. Prebus		M.M. Prebus	2021-06-25	2021-06-25	hand collecting	wet meadow in pine-fir forest	nest in gravelly soil	edge of wet meadow in pine-fir forest with Pinus jeffreyi, Pseudotsuga menziesii, Abies concolor, and Calocedrus decurrens. Soil was a mixure of granite gravel and silt.	Clark Fork trailhead	Tuolumne	California	United States	1975m	38.4186	-119.749	10m	Nearctic

## Sheet: table_S2_dissections
genus	specimen	extract	SpecimenCode	colony	population	colony count	# cestode larvae
Manica	parasitica_1	P1190	CASENT4010592	MMP03579	Clark Fork	1	6
Manica	bradleyi_1	P1191	CASENT4010593	MMP03579	Clark Fork		0
Manica	bradleyi_2		CASENT4011042	MMP03579	Clark Fork		0
Manica	parasitica_1			CR210625-02	Clark Fork	2	4
Manica	bradleyi_1		CASENT4011043	CR210625-02	Clark Fork		0
Manica	parasitica_1	P1184	CASENT4010586	CR210622-01	Clark Fork	3	4
Manica	parasitica_2		CASENT4011093	CR210622-01	Clark Fork		3
Manica	parasitica_3		CASENT4011092	CR210622-01	Clark Fork		1
Manica	bradleyi_1	P1185	CASENT4010587	CR210622-01	Clark Fork		0
Manica	bradleyi_2		CASENT4011091	CR210622-01	Clark Fork		0
Manica	bradleyi_3		CASENT4011090	CR210622-01	Clark Fork		0
Manica	parasitica_1	P1186	CASENT4010588	MMP03587	Clark Fork	4	12
Manica	parasitica_2		CASENT4011049	MMP03587	Clark Fork		1
Manica	parasitica_3		CASENT4011050	MMP03587	Clark Fork		4
Manica	bradleyi_1	P1187	CASENT4010589	MMP03587	Clark Fork		0
Manica	bradleyi_2		CASENT4011051	MMP03587	Clark Fork		0
Manica	bradleyi_3		CASENT4011053	MMP03587	Clark Fork		0
Manica	parasitica_1	P1188	CASENT4010590	MMP03585	Clark Fork	5	1
Manica	parasitica_2		CASENT4011088	MMP03585	Clark Fork		1
Manica	parasitica_3		CASENT4011089	MMP03585	Clark Fork		1
Manica	bradleyi_1	P1189	CASENT4010591	MMP03585	Clark Fork		0
Manica	bradleyi_2		CASENT4011086	MMP03585	Clark Fork		0
Manica	bradleyi_3		CASENT4011087	MMP03585	Clark Fork		0
Manica	parasitica_1	P1192	CASENT4010594	CR210624-01	Clark Fork	6	27
Manica	parasitica_2		CASENT4011056	CR210624-01	Clark Fork		6
Manica	parasitica_3		CASENT4011057	CR210624-01	Clark Fork		2
Manica	bradleyi_1	P1193	CASENT4010595	CR210624-01	Clark Fork		0
Manica	bradleyi_2		CASENT4011059	CR210624-01	Clark Fork		0
Manica	bradleyi_3		CASENT4011060	CR210624-01	Clark Fork		0
Manica	parasitica_1	P1194	CASENT4010596	CR210625-01	Clark Fork	7	17
Manica	parasitica_2		CASENT4011061	CR210625-01	Clark Fork		1
Manica	parasitica_3		CASENT4011062	CR210625-01	Clark Fork		5
Manica	bradleyi_1	P1195	CASENT4010597	CR210625-01	Clark Fork		0
Manica	bradleyi_2		CASENT4011094	CR210625-01	Clark Fork		0
Manica	bradleyi_3		CASENT4011095	CR210625-01	Clark Fork		0
Manica	parasitica_1	P1196	CASENT4010598	CR210623-01	Camp Wolfeboro	1	6
Manica	parasitica_2		CASENT4011099	CR210623-01	Camp Wolfeboro		1
Manica	bradleyi_1	P1197	CASENT4010599	CR210623-01	Camp Wolfeboro		0
Manica	bradleyi_2		CASENT4011098	CR210623-01	Camp Wolfeboro		0
Manica	parasitica_1	P1198	CASENT4010600	CR210623-04	Camp Wolfeboro	2	3
Manica	parasitica_2		CASENT4011067	CR210623-04	Camp Wolfeboro		1
Manica	parasitica_3		CASENT4011097	CR210623-04	Camp Wolfeboro		19
Manica	bradleyi_1	P1199	CASENT4010601	CR210623-04	Camp Wolfeboro		0
Manica	bradleyi_2		CASENT4011068	CR210623-04	Camp Wolfeboro		0
Manica	bradleyi_3		CASENT4011069	CR210623-04	Camp Wolfeboro		0
Manica	parasitica_1	P1200	CASENT4010602	CR210623-05	Camp Wolfeboro	3	4
Manica	parasitica_2		CASENT4011070	CR210623-05	Camp Wolfeboro		8
Manica	bradleyi_1	P1201	CASENT4010603	CR210623-05	Camp Wolfeboro		0
Manica	bradleyi_2		CASENT4011071	CR210623-05	Camp Wolfeboro		0
Manica	parasitica_1	P1202	CASENT4010604	MMP03582	Camp Wolfeboro	4	20
Manica	parasitica_2	P1204	CASENT4010606	MMP03582	Camp Wolfeboro		31
Manica	parasitica_3		CASENT4011073	MMP03582	Camp Wolfeboro		31
Manica	parasitica_4		CASENT4011076	MMP03582	Camp Wolfeboro		12
Manica	bradleyi_1	P1203	CASENT4010605	MMP03582	Camp Wolfeboro		0
Manica	bradleyi_2	P1205	CASENT4010607	MMP03582	Camp Wolfeboro		0
Manica	bradleyi_3		CASENT4011081	MMP03582	Camp Wolfeboro		0
Manica	bradleyi_4		CASENT4011082	MMP03582	Camp Wolfeboro		0
Manica	parasitica_1	P1206	CASENT4010608	MMP03583	Camp Wolfeboro	5	8
Manica	parasitica_2		CASENT4011079	MMP03583	Camp Wolfeboro		16
Manica	parasitica_3		CASENT4011080	MMP03583	Camp Wolfeboro		4
Manica	parasitica_4		CASENT4011085	MMP03583	Camp Wolfeboro		1
Manica	bradleyi_1	P1207	CASENT4010609	MMP03583	Camp Wolfeboro		0
Manica	bradleyi_2		CASENT4011072	MMP03583	Camp Wolfeboro		0
Manica	bradleyi_3		CASENT4011075	MMP03583	Camp Wolfeboro		0
Manica	bradleyi_4		CASENT4011078	MMP03583	Camp Wolfeboro		0

## Sheet: table_S3_morphometrics
Genus	species	SpecimenCode	Collection Code	Locality	WL	SL	HW	HL	PrdH	PEH	NOH	PEW	PPW	HFL	CS	SI	SI2	CSI	PrdHI	PEHI	NOHI	NOHI2	PPWI	PPWI2	HFLI	HWI	HLI
Manica	parasitica	CASENT4010598	CR210623-01	Camp Wolfeboro	1.634	0.985	1.064	1.157	0.5	-	-	-	-	1.327	1.6425	60.2815	92.5752	100.52	30.5998	-	-	-	-	-	81.2118	65.1163	70.8078
Manica	parasitica	CASENT4011065	CR210623-01	Camp Wolfeboro	1.638	-	-	-	0.44	0.326	0.212	0.297	0.416	1.244	-	-	-	-	26.862	19.9023	12.9426	65.0307	25.3968	140.067	75.9463	-	-
Manica	parasitica	CASENT4011099	CR210623-01	Camp Wolfeboro	1.748	1.009	1.137	1.193	0.475	0.345	0.225	0.316	0.45	1.393	1.7335	57.7231	88.7423	99.1705	27.1739	19.7368	12.8719	65.2174	25.7437	142.405	79.6911	65.0458	68.2494
Manica	parasitica	CASENT4010600	CR210623-04	Camp Wolfeboro	1.625	0.966	0.991	1.072	0.509	0.293	0.192	0.279	0.384	1.209	1.527	59.4462	97.4773	93.9692	31.3231	18.0308	11.8154	65.529	23.6308	137.634	74.4	60.9846	65.9692
Manica	parasitica	CASENT4011067	CR210623-04	Camp Wolfeboro	2.066	1.104	1.325	1.374	0.639	0.417	0.27	0.377	0.522	1.487	2.012	53.4366	83.3208	97.3863	30.9293	20.1839	13.0687	64.7482	25.2662	138.462	71.9748	64.1336	66.5053
Manica	parasitica	CASENT4011097	CR210623-04	Camp Wolfeboro	1.373	0.842	0.895	0.988	0.389	0.274	0.165	0.24	0.352	1.071	1.389	61.3256	94.0782	101.165	28.3321	19.9563	12.0175	60.219	25.6373	146.667	78.0044	65.1857	71.9592
Manica	parasitica	CASENT4010602	CR210623-05	Camp Wolfeboro	1.959	1.114	1.325	-	0.557	0.389	0.289	-	-	1.546	-	56.8657	84.0755	-	28.4329	19.8571	14.7524	74.2931	-	-	78.9178	67.6365	-
Manica	parasitica	CASENT4011070	CR210623-05	Camp Wolfeboro	1.901	1.165	1.368	1.343	0.594	0.421	0.292	0.38	0.519	1.501	2.0395	61.2835	85.1608	107.286	31.2467	22.1462	15.3603	69.3587	27.3014	136.579	78.9584	71.9621	70.647
Manica	parasitica	CASENT4010604	MMP03582	Camp Wolfeboro	1.609	1.021	1.066	1.173	0.499	0.318	0.206	0.305	0.425	1.341	1.6525	63.4556	95.7786	102.704	31.0131	19.7638	12.803	64.7799	26.4139	139.344	83.3437	66.2523	72.9024
Manica	parasitica	CASENT4010606	MMP03582	Camp Wolfeboro	1.923	1.151	1.303	1.326	0.555	0.398	0.283	0.376	0.514	1.544	1.966	59.8544	88.3346	102.236	28.8612	20.6968	14.7166	71.1055	26.7291	136.702	80.2912	67.7587	68.9548
Manica	parasitica	CASENT4011073	MMP03582	Camp Wolfeboro	1.831	1.07	1.227	1.333	0.536	0.362	0.267	0.348	0.511	1.497	1.8935	58.438	87.2046	103.413	29.2736	19.7706	14.5822	73.7569	27.9082	146.839	81.7586	67.0126	72.8017
Manica	parasitica	CASENT4011076	MMP03582	Camp Wolfeboro	1.845	1.032	1.294	1.309	0.53	0.372	0.265	0.355	0.5	1.509	1.9485	55.935	79.7527	105.61	28.7263	20.1626	14.3631	71.2366	27.1003	140.845	81.7886	70.1355	70.9485
Manica	parasitica	CASENT4011083	MMP03582	Camp Wolfeboro	1.597	0.941	1.002	1.105	0.428	0.29	0.203	0.261	0.357	1.204	1.5545	58.923	93.9122	97.3388	26.8003	18.159	12.7113	70	22.3544	136.782	75.3914	62.7426	69.1922
Manica	parasitica	CASENT4010608	MMP03583	Camp Wolfeboro	1.667	1.033	1.112	1.222	0.501	0.317	0.229	0.303	0.397	1.312	1.723	61.9676	92.8957	103.359	30.054	19.0162	13.7373	72.2397	23.8152	131.023	78.7043	66.7067	73.3053
Manica	parasitica	CASENT4011074	MMP03583	Camp Wolfeboro	1.725	1.024	1.105	1.173	0.487	0.332	0.228	0.321	0.414	1.316	1.6915	59.3623	92.6697	98.058	28.2319	19.2464	13.2174	68.6747	24	128.972	76.2899	64.058	68
Manica	parasitica	CASENT4011079	MMP03583	Camp Wolfeboro	1.663	0.99	1.076	1.094	0.481	0.341	0.232	0.317	0.448	1.352	1.623	59.531	92.0074	97.5947	28.9236	20.5051	13.9507	68.0352	26.9393	141.325	81.2989	64.7023	65.7847
Manica	parasitica	CASENT4011080	MMP03583	Camp Wolfeboro	1.696	0.992	1.076	1.165	0.465	0.299	0.231	0.289	0.402	1.224	1.6585	58.4906	92.1933	97.7889	27.4175	17.6297	13.6203	77.2575	23.7028	139.1	72.1698	63.4434	68.691
Manica	parasitica	CASENT4011085	MMP03583	Camp Wolfeboro	1.748	0.987	1.078	1.186	0.479	0.324	0.227	0.295	0.412	1.356	1.671	56.4645	91.5584	95.595	27.4027	18.5355	12.9863	70.0617	23.5698	139.661	77.5744	61.6705	67.849
Manica	parasitica	CASENT4010586	CR210622-01	Clark Fork	2.247	1.248	1.539	1.477	0.649	0.47	0.318	0.447	0.643	1.837	2.2775	55.5407	81.0916	101.357	28.883	20.9168	14.1522	67.6596	28.6159	143.848	81.7534	68.4913	65.7321
Manica	parasitica	CASENT4011045	CR210622-01	Clark Fork	2.118	1.208	1.438	1.421	0.599	0.439	0.274	0.389	0.566	1.725	2.1485	57.0349	84.0056	101.44	28.2814	20.7271	12.9367	62.4146	26.7233	145.501	81.4448	67.8942	67.0916
Manica	parasitica	CASENT4011046	CR210622-01	Clark Fork	2.049	1.143	1.358	1.424	0.556	0.408	0.261	0.36	0.539	1.537	2.07	55.7833	84.1679	101.025	27.1352	19.9122	12.7379	63.9706	26.3055	149.722	75.0122	66.2762	69.4973
Manica	parasitica	CASENT4011093	CR210622-01	Clark Fork	1.821	-	1.347	1.287	0.542	0.358	0.277	0.36	0.495	1.201	1.9905	-	-	109.308	29.7639	19.6595	15.2114	77.3743	27.1829	137.5	65.9528	73.9703	70.6755
Manica	parasitica	CASENT4011092	CR210622-01	Clark Fork	1.696	1.048	1.181	1.196	0.474	0.36	0.255	0.336	0.463	1.295	1.779	61.7925	88.7384	104.894	27.9481	21.2264	15.0354	70.8333	27.2995	137.798	76.3561	69.6344	70.5189
Manica	parasitica	CASENT4010594	CR210624-01	Clark Fork	1.836	-	-	1.259	0.508	0.362	0.265	0.356	0.501	1.469	-	-	-	-	27.6688	19.7168	14.4336	73.2044	27.2876	140.73	80.0109	-	68.573
Manica	parasitica	CASENT4011056	CR210624-01	Clark Fork	1.724	1.054	1.148	1.246	0.564	0.35	0.224	-	-	1.407	1.771	61.1369	91.8118	102.726	32.7146	20.3016	12.993	64	-	-	81.6125	66.5893	72.2738
Manica	parasitica	CASENT4011057	CR210624-01	Clark Fork	1.903	1.07	1.238	1.309	0.49	0.367	0.251	-	-	1.485	1.8925	56.227	86.4297	99.4482	25.7488	19.2853	13.1897	68.3924	-	-	78.0347	65.0552	68.7861
Manica	parasitica	CASENT4010596	CR210625-01	Clark Fork	1.869	1.063	1.141	1.227	0.505	0.339	0.251	-	-	1.447	1.7545	56.8753	93.1639	93.8737	27.0198	18.138	13.4296	74.0413	-	-	77.4211	61.0487	65.6501
Manica	parasitica	CASENT4011044	CR210625-01	Clark Fork	1.768	0.969	1.094	1.184	0.456	-	-	-	-	1.363	1.686	54.8077	88.574	95.362	25.7919	-	-	-	-	-	77.0928	61.8778	66.9683
Manica	parasitica	CASENT4011061	CR210625-01	Clark Fork	1.749	0.993	1.156	1.239	0.501	0.335	0.271	-	-	1.389	1.7755	56.7753	85.8997	101.515	28.6449	19.1538	15.4946	80.8955	-	-	79.4168	66.0949	70.8405
Manica	parasitica	CASENT4011062	CR210625-01	Clark Fork	1.906	-	-	-	0.53	0.347	0.24	-	-	1.517	-	-	-	-	27.8069	18.2057	12.5918	69.1643	-	-	79.5908	-	-
Manica	parasitica	CASENT4011096	CR210625-01	Clark Fork	1.909	1.05	1.217	1.246	0.485	0.366	0.255	0.352	0.51	1.416	1.84	55.0026	86.2777	96.3855	25.406	19.1723	13.3578	69.6721	26.7156	144.886	74.175	63.7507	65.2698
Manica	parasitica	CASENT4010590	MMP03585	Clark Fork	2.065	1.172	1.387	1.376	0.607	0.428	0.294	0.372	0.535	1.572	2.075	56.7554	84.4989	100.484	29.3947	20.7264	14.2373	68.6916	25.908	143.817	76.1259	67.1671	66.6344
Manica	parasitica	CASENT4011052	MMP03585	Clark Fork	2.018	1.142	1.343	1.363	0.542	0.408	0.306	0.364	0.544	1.546	2.0245	56.5907	85.0335	100.322	26.8583	20.218	15.1635	75	26.9574	149.451	76.6105	66.551	67.5421
Manica	parasitica	CASENT4011058	MMP03585	Clark Fork	1.946	1.1	1.323	1.281	0.547	0.369	0.252	0.338	0.478	1.494	1.9635	56.5262	83.1444	100.899	28.1089	18.962	12.9496	68.2927	24.5632	141.42	76.7729	67.9856	65.8273
Manica	parasitica	CASENT4011088	MMP03585	Clark Fork	1.832	1.059	1.142	1.218	0.51	0.337	0.239	0.317	0.475	1.473	1.751	57.8057	92.732	95.5786	27.8384	18.3952	13.0459	70.9199	25.9279	149.842	80.4039	62.3362	66.4847
Manica	parasitica	CASENT4011089	MMP03585	Clark Fork	1.716	-	1.069	1.156	0.489	0.33	0.222	0.294	0.434	1.328	1.647	-	-	95.979	28.4965	19.2308	12.9371	67.2727	25.2914	147.619	77.3893	62.296	67.366
Manica	parasitica	CASENT4010588	MMP03587	Clark Fork	1.954	1.125	1.236	1.276	0.542	0.393	0.273	0.344	0.492	1.513	1.874	57.5742	91.0194	95.9058	27.738	20.1126	13.9713	69.4656	25.1791	143.023	77.4309	63.2549	65.3019
Manica	parasitica	CASENT4011049	MMP03587	Clark Fork	2.257	1.217	1.492	1.524	0.606	0.461	0.345	0.398	0.576	1.679	2.254	53.9211	81.5684	99.8671	26.8498	20.4253	15.2858	74.8373	25.5206	144.724	74.3908	66.1054	67.5233
Manica	parasitica	CASENT4011050	MMP03587	Clark Fork	1.768	1.025	1.159	1.245	0.467	0.351	0.228	0.319	0.464	1.399	1.7815	57.9751	88.4383	100.764	26.414	19.8529	12.8959	64.9573	26.2443	145.455	79.129	65.5543	70.4186
Manica	parasitica	CASENT4010592	MMP03579	Clark Fork	1.924	1.132	1.268	1.325	0.559	0.396	0.278	0.361	0.482	1.586	1.9305	58.8358	89.2744	100.338	29.0541	20.5821	14.4491	70.202	25.052	133.518	82.4324	65.9044	68.8669
Manica	bradleyi	CASENT4010599	CR210623-01	Camp Wolfeboro	2.377	1.268	1.588	1.611	0.644	0.469	0.332	0.411	0.574	1.707	2.3935	53.3446	79.8489	100.694	27.093	19.7308	13.9672	70.7889	24.1481	139.659	71.8132	66.8069	67.7745
Manica	bradleyi	CASENT4011066	CR210623-01	Camp Wolfeboro	2.222	1.233	1.473	1.557	0.694	0.461	0.298	0.39	0.549	1.599	2.2515	55.4905	83.7067	101.328	31.2331	20.7471	13.4113	64.6421	24.7075	140.769	71.9622	66.2916	70.072
Manica	bradleyi	CASENT4011098	CR210623-01	Camp Wolfeboro	2.252	1.201	1.564	1.545	0.676	0.463	0.315	0.398	0.56	1.708	2.3365	53.3304	76.7903	103.752	30.0178	20.5595	13.9876	68.0346	24.8668	140.704	75.8437	69.4494	68.6057
Manica	bradleyi	CASENT4010601	CR210623-04	Camp Wolfeboro	2.051	1.136	1.344	1.345	0.606	0.437	0.281	0.368	0.528	1.592	2.0165	55.3876	84.5238	98.3179	29.5466	21.3067	13.7006	64.3021	25.7435	143.478	77.6207	65.529	65.5778
Manica	bradleyi	CASENT4011068	CR210623-04	Camp Wolfeboro	1.866	1.068	1.207	1.293	0.518	0.36	0.248	0.321	0.452	1.443	1.8535	57.2347	88.4838	99.3301	27.7599	19.2926	13.2905	68.8889	24.2229	140.81	77.3312	64.6838	69.2926
Manica	bradleyi	CASENT4011069	CR210623-04	Camp Wolfeboro	1.701	1.022	1.132	1.204	0.536	0.348	0.258	0.322	0.437	1.319	1.734	60.0823	90.2827	101.94	31.5109	20.4586	15.1675	74.1379	25.6908	135.714	77.5426	66.5491	70.7819
Manica	bradleyi	CASENT4010603	CR210623-05	Camp Wolfeboro	1.831	1.149	1.268	1.319	0.556	0.386	0.274	0.348	0.473	1.469	1.9275	62.7526	90.6151	105.27	30.3659	21.0814	14.9645	70.9845	25.8329	135.92	80.2294	69.2518	72.0371
Manica	bradleyi	CASENT4011071	CR210623-05	Camp Wolfeboro	1.731	1.023	1.132	1.199	0.492	0.327	0.237	0.298	0.415	1.358	1.7315	59.0988	90.371	100.029	28.4229	18.8908	13.6915	72.4771	23.9746	139.262	78.4518	65.3957	69.2663
Manica	bradleyi	CASENT4010605	MMP03582	Camp Wolfeboro	1.882	1.074	1.248	1.339	0.578	0.357	0.264	0.328	0.461	1.412	1.9175	57.067	86.0577	101.886	30.712	18.9692	14.0276	73.9496	24.4952	140.549	75.0266	66.3124	71.1477
Manica	bradleyi	CASENT4010607	MMP03582	Camp Wolfeboro	1.897	1.141	1.272	1.307	0.524	0.369	0.259	0.336	0.464	1.454	1.9255	60.1476	89.7013	101.502	27.6226	19.4518	13.6531	70.1897	24.4597	138.095	76.6473	67.0532	68.8983
Manica	bradleyi	CASENT4011077	MMP03582	Camp Wolfeboro	2.166	1.172	1.444	1.449	0.651	0.452	0.306	0.39	0.525	1.614	2.1685	54.109	81.1634	100.115	30.0554	20.868	14.1274	67.6991	24.2382	134.615	74.5152	66.6667	66.8975
Manica	bradleyi	CASENT4011081	MMP03582	Camp Wolfeboro	1.866	1.111	1.325	1.396	0.556	0.387	0.253	0.346	0.497	1.468	2.023	59.5391	83.8491	108.414	29.7964	20.7395	13.5584	65.3747	26.6345	143.642	78.671	71.0075	74.8124
Manica	bradleyi	CASENT4011082	MMP03582	Camp Wolfeboro	1.561	0.954	0.964	1.092	0.411	0.297	0.204	0.247	0.372	1.267	1.51	61.1147	98.9627	96.7329	26.3293	19.0263	13.0685	68.6869	23.8309	150.607	81.1659	61.7553	69.9552
Manica	bradleyi	CASENT4010609	MMP03583	Camp Wolfeboro	1.646	1.002	1.069	1.148	0.453	0.303	0.226	0.288	0.398	1.306	1.643	60.8748	93.7325	99.8177	27.5213	18.4083	13.7303	74.5875	24.1798	138.194	79.3439	64.9453	69.7448
Manica	bradleyi	CASENT4011072	MMP03583	Camp Wolfeboro	1.588	0.928	0.989	1.127	0.428	0.287	0.193	0.286	0.4	1.203	1.5525	58.4383	93.8322	97.7645	26.9521	18.073	12.1537	67.2474	25.1889	139.86	75.7557	62.2796	70.9698
Manica	bradleyi	CASENT4011075	MMP03583	Camp Wolfeboro	1.825	1.048	1.202	1.283	0.546	0.34	0.236	0.323	0.446	1.417	1.8435	57.4247	87.188	101.014	29.9178	18.6301	12.9315	69.4118	24.4384	138.08	77.6438	65.863	70.3014
Manica	bradleyi	CASENT4011078	MMP03583	Camp Wolfeboro	1.743	1.042	1.181	1.196	0.553	0.338	0.22	0.31	0.441	1.403	1.779	59.782	88.2303	102.065	31.7269	19.3919	12.6219	65.0888	25.3012	142.258	80.4934	67.7567	68.6173
Manica	bradleyi	CASENT4011084	MMP03583	Camp Wolfeboro	1.672	0.937	1.038	1.129	0.456	0.311	0.228	0.298	0.406	1.278	1.6025	56.0407	90.2697	95.8433	27.2727	18.6005	13.6364	73.3119	24.2823	136.242	76.4354	62.0813	67.5239
Manica	bradleyi	CASENT4010587	CR210622-01	Clark Fork	2.122	1.106	1.465	1.479	0.533	0.388	0.265	0.349	0.504	1.654	2.2045	52.1206	75.4949	103.888	25.1178	18.2846	12.4882	68.299	23.7512	144.413	77.9453	69.0386	69.6984
Manica	bradleyi	CASENT4011047	CR210622-01	Clark Fork	2.153	1.247	1.433	1.506	0.675	0.424	0.282	0.377	0.533	1.446	2.186	57.9192	87.0202	101.533	31.3516	19.6935	13.098	66.5094	24.7562	141.379	67.1621	66.5583	69.9489
Manica	bradleyi	CASENT4011048	CR210622-01	Clark Fork	1.898	-	-	-	0.615	0.406	0.267	0.344	0.54	1.469	-	-	-	-	32.4025	21.3909	14.0674	65.7635	28.451	156.977	77.3973	-	-
Manica	bradleyi	CASENT4011091	CR210622-01	Clark Fork	2.165	1.214	1.483	1.503	0.614	0.448	0.306	0.36	0.537	1.637	2.2345	56.0739	81.8611	103.21	28.3603	20.6928	14.1339	68.3036	24.8037	149.167	75.612	68.4988	69.4226
Manica	bradleyi	CASENT4011090	CR210622-01	Clark Fork	1.923	1.084	1.286	1.288	0.56	0.392	0.256	0.348	0.475	1.506	1.93	56.3703	84.2924	100.364	29.1212	20.3848	13.3125	65.3061	24.701	136.494	78.3151	66.8747	66.9787
Manica	bradleyi	CASENT4010595	CR210624-01	Clark Fork	2.218	1.227	1.508	1.547	0.663	0.461	0.284	-	-	1.679	2.2815	55.3201	81.366	102.863	29.8918	20.7845	12.8043	61.6052	-	-	75.6988	67.9892	69.7475
Manica	bradleyi	CASENT4011059	CR210624-01	Clark Fork	2.348	1.297	1.543	1.571	0.655	0.468	0.308	0.422	0.58	1.647	2.3285	55.2385	84.057	99.1695	27.8961	19.9319	13.1175	65.812	24.7019	137.441	70.1448	65.7155	66.908
Manica	bradleyi	CASENT4011060	CR210624-01	Clark Fork	1.968	1.134	1.386	1.411	0.568	0.378	0.243	-	-	1.545	2.0915	57.622	81.8182	106.275	28.8618	19.2073	12.3476	64.2857	-	-	78.5061	70.4268	71.6972
Manica	bradleyi	CASENT4010597	CR210625-01	Clark Fork	1.926	-	1.293	1.416	0.563	0.392	0.258	0.345	0.513	1.567	2.001	-	-	103.894	29.2316	20.3531	13.3956	65.8163	26.6355	148.696	81.3603	67.134	73.5202
Manica	bradleyi	CASENT4011063	CR210625-01	Clark Fork	2.048	1.151	1.315	1.342	0.597	0.382	0.269	0.331	0.486	1.532	1.986	56.2012	87.5285	96.9727	29.1504	18.6523	13.1348	70.4188	23.7305	146.828	74.8047	64.209	65.5273
Manica	bradleyi	CASENT4011064	CR210625-01	Clark Fork	1.793	1.125	1.266	1.353	0.483	0.357	0.258	-	-	1.421	1.9425	62.744	88.8626	108.338	26.9381	19.9108	14.3893	72.2689	-	-	79.2526	70.6079	75.4601
Manica	bradleyi	CASENT4011094	CR210625-01	Clark Fork	1.992	1.081	1.287	1.339	0.593	0.384	0.252	0.347	0.504	1.435	1.9565	54.2671	83.9938	98.2179	29.7691	19.2771	12.6506	65.625	25.3012	145.245	72.0382	64.6084	67.2189
Manica	bradleyi	CASENT4011095	CR210625-01	Clark Fork	1.825	1.045	1.194	1.299	0.461	0.34	0.229	0.319	0.439	1.371	1.8435	57.2603	87.5209	101.014	25.2603	18.6301	12.5479	67.3529	24.0548	137.618	75.1233	65.4247	71.1781
Manica	bradleyi	CASENT4010591	MMP03585	Clark Fork	2.009	1.187	1.376	1.446	0.638	0.444	0.261	0.369	0.531	1.612	2.099	59.0841	86.2645	104.48	31.7571	22.1005	12.9915	58.7838	26.4311	143.902	80.2389	68.4918	71.9761
Manica	bradleyi	CASENT4011054	MMP03585	Clark Fork	2.172	1.205	1.471	1.525	0.661	0.446	0.296	0.371	0.53	1.615	2.2335	55.4788	81.9171	102.831	30.4328	20.5341	13.628	66.3677	24.4015	142.857	74.3554	67.7256	70.2118
Manica	bradleyi	CASENT4011055	MMP03585	Clark Fork	2.094	1.155	1.356	1.414	0.582	0.411	0.256	0.342	0.488	1.559	2.063	55.1576	85.177	98.5196	27.7937	19.6275	12.2254	62.2871	23.3047	142.69	74.4508	64.7564	67.5263
Manica	bradleyi	CASENT4011086	MMP03585	Clark Fork	1.578	0.862	0.979	1.079	0.429	0.294	0.183	0.272	0.383	1.225	1.5185	54.6261	88.049	96.2294	27.1863	18.6312	11.597	62.2449	24.2712	140.809	77.6299	62.0406	68.3777
Manica	bradleyi	CASENT4011087	MMP03585	Clark Fork	2.014	1.207	1.311	1.348	0.656	0.459	0.313	0.398	0.548	1.501	1.985	59.9305	92.0671	98.5601	32.572	22.7905	15.5412	68.1917	27.2095	137.688	74.5283	65.0943	66.9315
Manica	bradleyi	CASENT4010589	MMP03587	Clark Fork	1.895	1.08	1.233	1.337	0.554	0.37	0.236	0.336	0.475	1.461	1.9015	56.9921	87.5912	100.343	29.2348	19.5251	12.4538	63.7838	25.066	141.369	77.0976	65.066	70.5541
Manica	bradleyi	CASENT4011051	MMP03587	Clark Fork	2.149	1.161	1.396	1.484	0.6	0.42	0.288	0.375	0.51	1.589	2.138	54.0251	83.1662	99.4881	27.92	19.544	13.4016	68.5714	23.732	136	73.9414	64.9604	69.0554
Manica	bradleyi	CASENT4011053	MMP03587	Clark Fork	2.029	1.105	1.319	1.363	0.54	0.4	0.268	0.335	0.49	1.534	2.0005	54.4603	83.7756	98.5954	26.6141	19.7141	13.2085	67	24.1498	146.269	75.6037	65.0074	67.1759
Manica	bradleyi	CASENT4010593	MMP03579	Clark Fork	2.271	1.244	1.575	1.585	0.663	0.465	0.299	0.394	0.53	1.714	2.3675	54.7776	78.9841	104.249	29.1942	20.4756	13.166	64.3011	23.3377	134.518	75.4734	69.3527	69.793
Manica	bradleyi	CASENT4011042	MMP03579	Clark Fork	2.361	1.223	1.564	1.585	0.696	0.488	0.324	0.398	0.554	1.736	2.3565	51.8001	78.1969	99.8094	29.479	20.6692	13.723	66.3934	23.4646	139.196	73.5282	66.2431	67.1326
Manica	bradleyi	CASENT4011043	CR210625-02	Clark Fork	2.114	1.165	1.392	1.498	0.635	0.438	0.287	0.379	0.551	1.518	2.141	55.1088	83.6925	101.277	30.0378	20.719	13.5762	65.5251	26.0643	145.383	71.807	65.8467	70.8609

## Sheet: table_S4_uce_stats
genus	species	extract	sample name	raw reads forward	raw reads reverse	i7 adapter	i5 adapter	demultiplex tag [i7+i5]	assembler	# raw read pairs	# clean read pairs	Total contigs	Total contigs mean length	Total contigs coverage (x)	UCE contigs	UCE total bp	UCE contigs mean length	UCE contigs 95 CI length	UCE contigs min length	UCE contigs max length	UCE contigs median length	UCE contigs > 1kb	UCE contigs coverage (x)	reference
Manica	bradleyi_CA_Camp_W_CR210623_01	P1197	Manica_bradleyi_CA_Camp_W_CR210623_01_P1197	SRR25921614_1.fastq.gz	SRR25921614_2.fastq.gz	i7-104_G01	itru5_05_E09	GTGCCATA+CTTAGGAC	SPAdes v3.12.0	4156398	3505658	355281	326.327	6.40275	2239	4294083	1917.86	10.8591	244	5335	1936	2163	63.7913	this study
Manica	bradleyi_CA_Camp_W_CR210623_04	P1199	Manica_bradleyi_CA_Camp_W_CR210623_04_P1199	SRR25921612_1.fastq.gz	SRR25921612_2.fastq.gz	i7-104_G03	itru5_05_G09	GCTGGATT+ACATGCCA	SPAdes v3.12.0	4429569	3791399	366323	327.43	6.59488	2240	4538684	2026.2	12.8208	252	8548	2033	2153	62.1694	this study
Manica	bradleyi_CA_Camp_W_CR210623_05	P1201	Manica_bradleyi_CA_Camp_W_CR210623_05_P1201	SRR25921601_1.fastq.gz	SRR25921601_2.fastq.gz	i7-104_G05	itru5_06_A011	ATGGTTGC+CGATCGAT	SPAdes v3.12.0	2918785	2455019	261560	302.142	6.2495	2284	4000456	1751.51	10.0906	225	3551	1764	2146	49.0244	this study
Manica	bradleyi_CA_Camp_W_MMP03582_1	P1203	Manica_bradleyi_CA_Camp_W_MMP03582_1_P1203	SRR25921599_1.fastq.gz	SRR25921599_2.fastq.gz	i7-104_G07	itru5_06_C011	TTAGGTCG+AGCTACCA	SPAdes v3.12.0	3591966	3071609	325812	301.507	6.49789	2246	4037146	1797.48	10.398	223	5844	1813	2127	58.6055	this study
Manica	bradleyi_CA_Camp_W_MMP03582_2	P1205	Manica_bradleyi_CA_Camp_W_MMP03582_2_P1205	SRR25921596_1.fastq.gz	SRR25921596_2.fastq.gz	i7-104_G09	itru5_06_E011	AGAGCCTT+TATGACCG	SPAdes v3.12.0	4513061	3865223	379446	339.945	6.16008	2237	4506265	2014.42	12.4273	230	5003	1995	2151	58.4559	this study
Manica	bradleyi_CA_Camp_W_MMP03583_1	P1207	Manica_bradleyi_CA_Camp_W_MMP03583_1_P1207	SRR25921594_1.fastq.gz	SRR25921594_2.fastq.gz	i7-104_G11	itru5_06_G011	CTGGAGTA+GATCTTGC	SPAdes v3.12.0	2504628	2103703	222805	298.28	6.25721	2252	3923181	1742.09	12.1407	206	15732	1759.5	2094	43.876	this study
Manica	bradleyi_CA_Carson_Pass	P589	Manica_bradleyi_CA_Carson_Pass_P589	SRR25921605_1.fastq.gz	SRR25921605_2.fastq.gz	i7_101_A09	i5_06_A011	TGTACACC+CGATCGAT	SPAdes v3.12.0	4574881	4439523	284013	284.962	8.50478	2387	2451224	1026.91	6.20983	216	3395	1018	1283	87.4604	this study
Manica	bradleyi_CA_Clark_Fork	P605	Manica_bradleyi_CA_Clark_Fork_P605	SRR25921592_1.fastq.gz	SRR25921592_2.fastq.gz	i7_103_E01	i5_02_A03	CAGCGATT+CTTCGCAA	SPAdes v3.12.0	6798191	6208532	456507	353.691	7.3271	2266	4569511	2016.55	13.5799	206	7800	1979	2176	79.5219	this study
Manica	bradleyi_CA_Clark_Fork_CR210622_01	P1185	Manica_bradleyi_CA_Clark_Fork_CR210622_01_P1185	SRR25921618_1.fastq.gz	SRR25921618_2.fastq.gz	i7-103_E01	itru5_04_A07	CAGCGATT+CGTATCTC	SPAdes v3.12.0	7685905	6431601	502715	369.057	7.37901	2175	5456433	2508.7	17.6597	211	6407	2450	2129	75.2419	this study
Manica	bradleyi_CA_Clark_Fork_CR210624_01	P1193	Manica_bradleyi_CA_Clark_Fork_CR210624_01_P1193	SRR25921602_1.fastq.gz	SRR25921602_2.fastq.gz	i7-103_E09	itru5_05_A09	GGTGTCTT+GGTACGAA	SPAdes v3.12.0	3565901	2897235	285543	311.298	6.52308	2219	4425047	1994.16	11.8127	209	4814	2006	2124	53.0942	this study
Manica	bradleyi_CA_Clark_Fork_CR210625_01	P1195	Manica_bradleyi_CA_Clark_Fork_CR210625_01_P1195	SRR25921616_1.fastq.gz	SRR25921616_2.fastq.gz	i7-103_E11	itru5_05_C09	AGGTTCGA+GCCAATAC	SPAdes v3.12.0	3897140	3261499	349872	321.018	6.10517	2244	4341668	1934.79	11.6633	216	5292	1936	2146	56.2055	this study
Manica	bradleyi_CA_Clark_Fork_MMP03579	P1191	Manica_bradleyi_CA_Clark_Fork_MMP03579_P1191	SRR25921587_1.fastq.gz	SRR25921587_2.fastq.gz	i7-103_E07	itru5_04_G07	TGTGACTG+TCGAACCT	SPAdes v3.12.0	3042752	2464078	280829	309.967	5.68861	2254	4348955	1929.44	11.8355	210	6883	1956	2142	42.4774	this study
Manica	bradleyi_CA_Clark_Fork_MMP03585	P1189	Manica_bradleyi_CA_Clark_Fork_MMP03585_P1189	SRR25921589_1.fastq.gz	SRR25921589_2.fastq.gz	i7-103_E05	itru5_04_E07	GCATGTCT+ACCGCTAT	SPAdes v3.12.0	2688469	2166758	253071	291.782	5.9583	2256	4122182	1827.21	10.6329	220	3727	1866	2133	42.0209	this study
Manica	bradleyi_CA_Clark_Fork_MMP03587	P1187	Manica_bradleyi_CA_Clark_Fork_MMP03587_P1187	SRR25921604_1.fastq.gz	SRR25921604_2.fastq.gz	i7-103_E03	itru5_04_C07	CGAGACTA+CCATGAAC	SPAdes v3.12.0	4816273	3983480	382535	348.322	6.2553	2217	4583472	2067.42	13.1081	230	5339	2054	2151	63.8086	this study
Manica	bradleyi_CA_Hope_Valley	P860	Manica_bradleyi_CA_Hope_Valley_P860	SRR25921591_1.fastq.gz	SRR25921591_2.fastq.gz	i7-101_A02	itru5_02_B03	CTGTGTTG+GTGGTATG	SPAdes v3.12.0	3050676	2747980	273366	297.345	6.46721	2360	3373095	1429.28	8.08717	286	3623	1428	2048	60.9543	this study
Manica	bradleyi_CA_Lake_Tahoe	P581	Manica_bradleyi_CA_Lake_Tahoe_P581	SRR25921609_1.fastq.gz	SRR25921609_2.fastq.gz	i7_101_A01	i5_05_A09	ACGTTACC+GGTACGAA	SPAdes v3.12.0	3512604	3309628	234885	272.82	7.10305	2414	2502455	1036.64	5.86151	214	2983	1040	1361	62.7111	this study
Manica	bradleyi_CA_Lang_Crossing	P588	Manica_bradleyi_CA_Lang_Crossing_P588	SRR25921606_1.fastq.gz	SRR25921606_2.fastq.gz	i7_101_A08	i5_05_H09	CCTATGGT+GATGGAGT	SPAdes v3.12.0	3047838	2920644	224835	258.235	7.19704	2412	2095612	868.828	5.20239	207	2992	861	628	53.6247	this study
Manica	bradleyi_CA_Sand_Flat	CASENT0106022	Manica_bradleyi_CA_Sand_Flat_CASENT0106022	SRR7248539_1.fastq.gz	SRR7248539_2.fastq.gz	n/a	n/a	n/a	SPAdes v3.12.0	n/a	2367669	316319	260.336	5.3999	2408	2504304	1039.99	6.36266	112	2668	1035	1323	37.1413	Blaimer et al. 2018
Manica	bradleyi_CA_Sequoia	P1208	Manica_bradleyi_CA_Sequoia_P1208	SRR25921610_1.fastq.gz	SRR25921610_2.fastq.gz	i7-104_G12	itru5_06_H011	GAACATCG+CCTCGTTA	SPAdes v3.12.0	2984842	2611956	309200	300.557	5.98762	2257	3812948	1689.39	10.4916	267	4582	1683	2090	50.6211	this study
Manica	bradleyi_CA_Wrightwood	P587	Manica_bradleyi_CA_Wrightwood_P587	SRR25921607_1.fastq.gz	SRR25921607_2.fastq.gz	i7_101_A07	i5_05_G09	ACTCGTTG+ACATGCCA	SPAdes v3.12.0	4480273	4229229	306567	298.383	7.79657	2376	3213241	1352.37	8.05614	213	3904	1343	1969	80.4707	this study
Manica	bradleyi_NV_Mt_Rose	P586	Manica_bradleyi_NV_Mt_Rose_P586	SRR25921608_1.fastq.gz	SRR25921608_2.fastq.gz	i7_101_A06	i5_05_F09	AACAACCG+TCAGCCTT	SPAdes v3.12.0	5533299	5166705	380157	309.689	7.04474	2231	3443303	1543.39	9.93886	209	7512	1517	2002	63.4335	this study
Manica	invidia_CA_Lang_Crossing	P596	Manica_invidia_CA_Lang_Crossing_P596	SRR25921603_1.fastq.gz	SRR25921603_2.fastq.gz	i7_102_C04	i5_06_H011	GATTCAGC+CCTCGTTA	SPAdes v3.12.0	2514149	2448392	174287	248.043	8.73508	2416	1856742	768.519	4.7499	210	2192	765	361	77.355	this study
Manica	parasitica_CA_Camp_W_CR210623_01	P1196	Manica_parasitica_CA_Camp_W_CR210623_01_P1196	SRR25921615_1.fastq.gz	SRR25921615_2.fastq.gz	i7-103_E12	itru5_05_D09	CATGTTCC+CTGTATGC	SPAdes v3.12.0	3786682	3272463	345403	311.199	6.24692	2250	4172833	1854.59	11.4449	230	4358	1861	2121	54.7278	this study
Manica	parasitica_CA_Camp_W_CR210623_04	P1198	Manica_parasitica_CA_Camp_W_CR210623_04_P1198	SRR25921613_1.fastq.gz	SRR25921613_2.fastq.gz	i7-104_G02	itru5_05_F09	CCTTGTAG+TCAGCCTT	SPAdes v3.12.0	4162768	3621310	370585	323.039	6.34125	2243	4289686	1912.48	11.8057	225	5053	1908	2142	60.4496	this study
Manica	parasitica_CA_Camp_W_CR210623_05	P1200	Manica_parasitica_CA_Camp_W_CR210623_05_P1200	SRR25921611_1.fastq.gz	SRR25921611_2.fastq.gz	i7-104_G04	itru5_05_H09	TAACGAGG+GATGGAGT	SPAdes v3.12.0	3134092	2534262	290772	306.421	5.83716	2244	4371841	1948.24	11.737	217	4031	1966	2134	44.091	this study
Manica	parasitica_CA_Camp_W_MMP03582_1	P1202	Manica_parasitica_CA_Camp_W_MMP03582_1_P1202	SRR25921600_1.fastq.gz	SRR25921600_2.fastq.gz	i7-104_G06	itru5_06_B011	CCTATACC+TACTCCAG	SPAdes v3.12.0	2196155	1873427	191989	284.562	6.27429	2306	3568487	1547.48	9.27051	222	3143	1565	2054	39.9288	this study
Manica	parasitica_CA_Camp_W_MMP03582_2	P1204	Manica_parasitica_CA_Camp_W_MMP03582_2_P1204	SRR25921597_1.fastq.gz	SRR25921597_2.fastq.gz	i7-104_G08	itru5_06_D011	GCAAGATC+TCGACAAG	SPAdes v3.12.0	3549143	2864205	323790	325.449	5.57002	2198	4532067	2061.9	12.3773	246	4732	2083	2118	45.6146	this study
Manica	parasitica_CA_Camp_W_MMP03583_1	P1206	Manica_parasitica_CA_Camp_W_MMP03583_1_P1206	SRR25921595_1.fastq.gz	SRR25921595_2.fastq.gz	i7-104_G10	itru5_06_F011	GCAATGGA+AGCCAACT	SPAdes v3.12.0	3672076	3071328	335904	312.902	6.06441	2234	4349311	1946.87	11.4137	241	3972	1954	2131	53.7447	this study
Manica	parasitica_CA_Clark_Fork	P604	Manica_parasitica_CA_Clark_Fork_P604	SRR25921593_1.fastq.gz	SRR25921593_2.fastq.gz	i7_102_C12	i5_01_H01	ACACGGTT+TAGCTGAG	SPAdes v3.12.0	3451561	3283361	248696	279.921	7.90341	2377	2975196	1251.66	7.49041	210	3186	1261	1806	75.1577	this study
Manica	parasitica_CA_Clark_Fork_CR210622_01	P1184	Manica_parasitica_CA_Clark_Fork_CR210622_01_P1184	SRR25921619_1.fastq.gz	SRR25921619_2.fastq.gz	i7-102_C12	itru5_03_H05	ACACGGTT+CAGTGCTT	SPAdes v3.12.0	4995330	4134795	422611	331.38	6.16847	2216	4671574	2108.11	13.1194	241	5107	2119	2143	59.5746	this study
Manica	parasitica_CA_Clark_Fork_CR210624_01	P1192	Manica_parasitica_CA_Clark_Fork_CR210624_01_P1192	SRR25921586_1.fastq.gz	SRR25921586_2.fastq.gz	i7-103_E08	itru5_04_H07	CGAAGAAC+TAGTGCCA	SPAdes v3.12.0	3400586	2832225	334422	316.207	5.48261	2247	4210992	1874.05	11.0224	243	4342	1881	2145	46.6826	this study
Manica	parasitica_CA_Clark_Fork_CR210625_01	P1194	Manica_parasitica_CA_Clark_Fork_CR210625_01_P1194	SRR25921617_1.fastq.gz	SRR25921617_2.fastq.gz	i7-103_E10	itru5_05_B09	AAGAAGGC+AAGCATCG	SPAdes v3.12.0	2480268	2068463	237640	297.331	5.83235	2282	3815470	1671.99	10.1684	186	3989	1686.5	2082	42.4372	this study
Manica	parasitica_CA_Clark_Fork_MMP03579	P1190	Manica_parasitica_CA_Clark_Fork_MMP03579_P1190	SRR25921588_1.fastq.gz	SRR25921588_2.fastq.gz	i7-103_E06	itru5_04_F07	ACTCCATC+TTCCAGGT	SPAdes v3.12.0	3277588	2576272	312442	313.176	5.28724	2231	4471755	2004.37	12.5959	226	5665	2034	2112	39.5734	this study
Manica	parasitica_CA_Clark_Fork_MMP03585	P1188	Manica_parasitica_CA_Clark_Fork_MMP03585_P1188	SRR25921590_1.fastq.gz	SRR25921590_2.fastq.gz	i7-103_E04	itru5_04_D07	GACATGGT+GGTACTTC	SPAdes v3.12.0	4926692	4070941	384749	346.273	6.43501	2246	4690876	2088.55	12.8802	56	5555	2080	2171	67.6633	this study
Manica	parasitica_CA_Clark_Fork_MMP03587	P1186	Manica_parasitica_CA_Clark_Fork_MMP03587_P1186	SRR25921598_1.fastq.gz	SRR25921598_2.fastq.gz	i7-103_E02	itru5_04_B07	TAGTGACC+CGTCAAGA	SPAdes v3.12.0	5377413	4471817	426862	327.046	6.89855	2221	4700124	2116.22	12.8553	294	5658	2105	2159	71.3582	this study
Myrmica	incompleta	EX808	Myrmica_incompleta_EX808	SRR5150634_1.fastq.gz	SRR5150634_2.fastq.gz	n/a	n/a	n/a	SPAdes v3.12.0	1445543	1412220	157719	265.293	6.43835	2362	2492993	1055.46	6.58284	206	3547	1078	1436	19.183	Branstetter et al. 2017
													mean	6.51153			1714.59						56.7292
